# Supplementary material for: Effect of Intermittent versus Chronic Calorie Restriction on Tumor Incidence: A Systematic Review and Meta-Analysis of Animal Studies
Source: PubMed Central journal article supplement (PMC5031958; doi:10.1038/srep33739), 2016-09-22
Supplement: srep33739-s1.pdf [file srep33739-s1.pdf]

**Supplementary Information for:**

**Effect of Intermittent versus Chronic Calorie Restriction on Tumor Incidence: A Systematic Review and Meta-Analysis of Animal Studies**

**Running title:** Intermittent vs. chronic calorie restriction on tumor incidence

Yalan Chen, MS<sup>1,2,\*</sup>, Lifeng Ling, MS<sup>1,3,\*</sup>, Guanglei Su, BsC<sup>1</sup>, Ming Han, BsC<sup>1</sup>, Xikang Fan, BsC<sup>1</sup>, PengchengXun, MD, PhD<sup>4,†</sup>, and Guangfei Xu, MD, PhD<sup>1,†</sup>

<sup>1</sup>Department of Nutrition and Food Science, School of Public Health, Nantong University, Nantong, Jiangsu, China;

<sup>2</sup>Department of Medical Informatics, School of Medicine, Nantong University, Nantong, Jiangsu, China;

<sup>3</sup>Department of Human Resources, Nantong University, Nantong, Jiangsu, China;

<sup>4</sup>Department of Epidemiology and Biostatistics, School of Public Health-Bloomington, Indiana University, Bloomington, IN, USA.

\*These authors contributed equally to this work.

**†Corresponding authors:**

Dr. Guangfei Xu; Department of Nutrition and Food Science, School of Public Health, Nantong University, No 9 Seyuan Rd, Nantong, Jiangsu 226019, China; Phone: 86-0513-8501-2911; E-mail: [xugf@ntu.edu.cn](mailto:xugf@ntu.edu.cn)

Dr. Pengcheng Xun; Department of Epidemiology and Biostatistics, School of Public Health-Bloomington, Indiana University, 1025 E. Seventh Street, C103, Bloomington, Indiana 47405, USA; Phone: 01-812-856-0772; Fax: 01-812-855-9907; E-mail:

[pxun@indiana.edu](mailto:pxun@indiana.edu)

**Supplementary Table 1. Assessment of Study Quality and Risk of Bias According to SYRCLE's RoB Tool.**

| Study                                      | # 1     | # 2     | # 3 | # 4     | # 5     | # 6     | # 7     | # 8     | # 9     | # 10    | Quality |
|--------------------------------------------|---------|---------|-----|---------|---------|---------|---------|---------|---------|---------|---------|
| <b>Genetically engineered mouse models</b> |         |         |     |         |         |         |         |         |         |         |         |
| Berrigan, 2002                             | Yes     | Yes     | No  | Yes     | No      | Unclear | Yes     | No      | Yes     | Yes     | 6       |
| Cleary, 2002                               | Unclear | Yes     | No  | Yes     | No      | Unclear | Yes     | Yes     | Yes     | Yes     | 6       |
| Pape-Ansorge, 2002                         | Unclear | Yes     | No  | Yes     | No      | Unclear | Yes     | Yes     | Yes     | Yes     | 6       |
| Cleary, 2007                               | Unclear | Yes     | No  | Yes     | No      | Unclear | Yes     | Yes     | Yes     | Yes     | 6       |
| Bonorden, 2009                             | Yes     | Yes     | No  | Yes     | No      | Unclear | Yes     | Yes     | Yes     | Yes     | 7       |
| Rogozina, 2009                             | Unclear | Yes     | No  | Yes     | No      | Unclear | Yes     | Yes     | No      | Yes     | 5       |
| Dogan, 2010                                | Yes     | Yes     | No  | Yes     | No      | Unclear | Yes     | Yes     | No      | Yes     | 6       |
| Lanza-Jacoby, 2013                         | Yes     | Yes     | No  | Yes     | No      | Unclear | Yes     | No      | Yes     | Yes     | 6       |
| Mizuno, 2013                               | Unclear | Yes     | No  | Yes     | No      | Unclear | Yes     | No      | Yes     | Yes     | 5       |
| Rogozina, 2013                             | Unclear | Yes     | No  | Yes     | No      | Unclear | Yes     | No      | Yes     | Yes     | 5       |
| Grossmann,<br>unpublished                  | Unclear | Unclear | No  | Unclear | Unclear | Unclear | Unclear | Unclear | Unclear | Unclear | 0       |
| <b>Chemically induced rat models</b>       |         |         |     |         |         |         |         |         |         |         |         |
| Kritchevsky, 1989                          | Yes     | Yes     | No  | Yes     | No      | Unclear | Yes     | Yes     | Yes     | Yes     | 7       |
| Mehta, 1993                                | Yes     | Yes     | No  | Yes     | No      | Unclear | Yes     | Yes     | Yes     | Yes     | 7       |
| Harris, 1995                               | Yes     | Yes     | No  | Yes     | No      | Unclear | Yes     | Yes     | Yes     | Yes     | 7       |
| Tagliaferro, 1996                          | Yes     | Yes     | No  | Yes     | No      | Unclear | Yes     | No      | Yes     | Yes     | 6       |
| Zhu, 2005                                  | Unclear | Yes     | No  | Yes     | No      | Unclear | Yes     | Yes     | Yes     | Yes     | 6       |

SYRCLE's RoB: SYSystematic Review Centre for Laboratory animal Experimentation; Item 1: sequence generation; 2: baseline characteristics; 3: allocation concealment; 4: random housing; 5: performance blinding; 6: random outcome assessment; 7: detection blinding; 8: incomplete outcome data adequately addressed; 9: free of selective outcome reporting; 10: free of other sources of bias; Yes: low risk of bias; no: high risk of bias; unclear: unclear risk of bias. Higher quality score represents lower the risk bias.

**Supplementary Table 2. PRISMA 2009 Checklist.**

| Section/topic                      | #  | Checklist item                                                                                                                                                                                                                                                                                              | Reported on page # |
|------------------------------------|----|-------------------------------------------------------------------------------------------------------------------------------------------------------------------------------------------------------------------------------------------------------------------------------------------------------------|--------------------|
| <b>TITLE</b>                       |    |                                                                                                                                                                                                                                                                                                             |                    |
| Title                              | 1  | Identify the report as a systematic review, meta-analysis, or both.                                                                                                                                                                                                                                         | 1                  |
| <b>ABSTRACT</b>                    |    |                                                                                                                                                                                                                                                                                                             |                    |
| Structured summary                 | 2  | Provide a structured summary including, as applicable: background; objectives; data sources; study eligibility criteria, participants, and interventions; study appraisal and synthesis methods; results; limitations; conclusions and implications of key findings; systematic review registration number. | 2                  |
| <b>INTRODUCTION</b>                |    |                                                                                                                                                                                                                                                                                                             |                    |
| Rationale                          | 3  | Describe the rationale for the review in the context of what is already known.                                                                                                                                                                                                                              | 3                  |
| Objectives                         | 4  | Provide an explicit statement of questions being addressed with reference to participants, interventions, comparisons, outcomes, and study design (PICOS).                                                                                                                                                  | 4                  |
| <b>METHODS</b>                     |    |                                                                                                                                                                                                                                                                                                             |                    |
| Protocol and registration          | 5  | Indicate if a review protocol exists, if and where it can be accessed (e.g., Web address), and, if available, provide registration information including registration number.                                                                                                                               |                    |
| Eligibility criteria               | 6  | Specify study characteristics (e.g., PICOS, length of follow-up) and report characteristics (e.g., years considered, language, publication status) used as criteria for eligibility, giving rationale.                                                                                                      | 5                  |
| Information sources                | 7  | Describe all information sources (e.g., databases with dates of coverage, contact with study authors to identify additional studies) in the search and date last searched.                                                                                                                                  | 4                  |
| Search                             | 8  | Present full electronic search strategy for at least one database, including any limits used, such that it could be repeated.                                                                                                                                                                               | 4                  |
| Study selection                    | 9  | State the process for selecting studies (i.e., screening, eligibility, included in systematic review, and, if applicable, included in the meta-analysis).                                                                                                                                                   | 5                  |
| Data collection process            | 10 | Describe method of data extraction from reports (e.g., piloted forms, independently, in duplicate) and any processes for obtaining and confirming data from investigators.                                                                                                                                  | 6                  |
| Data items                         | 11 | List and define all variables for which data were sought (e.g., PICOS, funding sources) and any assumptions and simplifications made.                                                                                                                                                                       | 6                  |
| Risk of bias in individual studies | 12 | Describe methods used for assessing risk of bias of individual studies (including specification of whether this was done at the study or outcome level), and how this information is to be used in any data synthesis.                                                                                      | 7                  |
| Summary measures                   | 13 | State the principal summary measures (e.g., risk ratio, difference in means).                                                                                                                                                                                                                               | 7                  |
| Synthesis of results               | 14 | Describe the methods of handling data and combining results of studies, if done, including measures of consistency (e.g., $I^2$ ) for each meta-analysis.                                                                                                                                                   | 7                  |
| Risk of bias across studies        | 15 | Specify any assessment of risk of bias that may affect the cumulative evidence (e.g., publication bias, selective reporting within studies).                                                                                                                                                                | 7                  |
| Additional analyses                | 16 | Describe methods of additional analyses (e.g., sensitivity or subgroup analyses, meta-regression), if done, indicating which were pre-specified.                                                                                                                                                            | 8                  |
| <b>RESULTS</b>                     |    |                                                                                                                                                                                                                                                                                                             |                    |
| Study selection                    | 17 | Give numbers of studies screened, assessed for eligibility, and included in the review, with reasons for exclusions at each stage, ideally with a flow diagram.                                                                                                                                             | 8-9                |
| Study characteristics              | 18 | For each study, present characteristics for which data were extracted (e.g., study size, PICOS, follow-up period) and provide                                                                                                                                                                               | 9-10               |

|                               |    |                                                                                                                                                                                                          |       |
|-------------------------------|----|----------------------------------------------------------------------------------------------------------------------------------------------------------------------------------------------------------|-------|
|                               |    | the citations.                                                                                                                                                                                           |       |
| Risk of bias within studies   | 19 | Present data on risk of bias of each study and, if available, any outcome level assessment (see item 12).                                                                                                | 10-12 |
| Results of individual studies | 20 | For all outcomes considered (benefits or harms), present, for each study: (a) simple summary data for each intervention group (b) effect estimates and confidence intervals, ideally with a forest plot. | 9-10  |
| Synthesis of results          | 21 | Present results of each meta-analysis done, including confidence intervals and measures of consistency.                                                                                                  | 10-12 |
| Risk of bias across studies   | 22 | Present results of any assessment of risk of bias across studies (see Item 15).                                                                                                                          | 10-12 |
| Additional analysis           | 23 | Give results of additional analyses, if done (e.g., sensitivity or subgroup analyses, meta-regression [see Item 16]).                                                                                    | 12    |
| <b>DISCUSSION</b>             |    |                                                                                                                                                                                                          |       |
| Summary of evidence           | 24 | Summarize the main findings including the strength of evidence for each main outcome; consider their relevance to key groups (e.g., healthcare providers, users, and policy makers).                     | 12    |
| Limitations                   | 25 | Discuss limitations at study and outcome level (e.g., risk of bias), and at review-level (e.g., incomplete retrieval of identified research, reporting bias).                                            | 16    |
| Conclusions                   | 26 | Provide a general interpretation of the results in the context of other evidence, and implications for future research.                                                                                  | 19    |
| <b>FUNDING</b>                |    |                                                                                                                                                                                                          |       |
| Funding                       | 27 | Describe sources of funding for the systematic review and other support (e.g., supply of data); role of funders for the systematic review.                                                               | 20    |

---

**Supplementary Table 3. Baseline Characteristics of the Studies Included in This Meta-analysis.**

| Study                                      | Group | Animal type                                        | Tumor type | Feeding regimens                                                                       | Trial length, W | Body weight, g              |
|--------------------------------------------|-------|----------------------------------------------------|------------|----------------------------------------------------------------------------------------|-----------------|-----------------------------|
| <b>Genetically engineered mouse models</b> |       |                                                    |            |                                                                                        |                 |                             |
| Berrigan, 2002                             | ICR   | p53+/- M                                           | Multiple   | 1 day/W of fasting 6 days/W of AL (AIN-76A)                                            | 48              | 38                          |
|                                            | CCR   | p53+/- M                                           | Multiple   | 60% AL (AIN-76A)                                                                       | 48              | 27                          |
| Cleary, 2002                               | ICR   | TGF-a/Lep <sup>+</sup> Lep <sup>ab</sup> FM        | Mammary    | 3 weeks of 50% AL (AIN-93-mod)<br>3 weeks of 100% AL (AIN-93M)                         | 72              | 27.2±1.1                    |
|                                            | CCR   | TGF-a/Lep <sup>+</sup> Lep <sup>ab</sup> FM        | Mammary    | 2:1 of AIN-93M:AIN-93-mod                                                              | 72              | 26.9± 0.9                   |
| Pape-Ansorge, 2002                         | ICR   | MMTVNeu FM                                         | Mammary    | 3 weeks of 50% AL (AIN-93-mod)<br>3 weeks of 100% AL (AIN-93M)                         | 73              | 31.1 ± 0.8                  |
|                                            | CCR   | MMTVNeu FM                                         | Mammary    | 2:1 of AIN-93M:AIN-93-mod                                                              | 73              | 28.0 ± 0.8                  |
| Cleary, 2007                               | ICR   | MMTV-TGF-a/Lepr <sup>+</sup> Lepr <sup>db</sup> FM | Mammary    | 3 weeks of 50% AL (AIN-93-mod)<br>3 weeks of 100% AL (AIN-93M)                         | 76              | R:25±0.7<br>RF:32.5±0.6     |
|                                            | CCR   | MMTV-TGF-a/Lepr <sup>+</sup> Lepr <sup>db</sup> FM | Mammary    | 2:1 of AIN-93M:AIN-93-mod                                                              | 76              | 26.2±0.5                    |
| Bonorden, 2009                             | ICR   | TRAMP M                                            | Prostate   | 2 weeks of 50% AL (AIN-93M)<br>2 weeks of 100% AL (AIN-93M)                            | 49              | R:27.4±0.7<br>RF:30.9±0.6   |
|                                            | CCR   | TRAMP M                                            | Prostate   | 75% AL (AIN-93M)                                                                       | 50              | 29.2 ± 0.4                  |
| Rogozina, 2009                             | ICR   | MMTV-TGF-α FM                                      | Mammary    | 3 weeks of 50% AL (AIN-93-mod)<br>3 weeks of 100% AL (AIN-93M)                         | 74              | R:24.3±0.5<br>RF:27.4±0.5   |
|                                            | CCR   | MMTV-TGF-α FM                                      | Mammary    | 75% AL (AIN-93M)                                                                       | 74              | 27.2±0.4                    |
| Dogan, 2010                                | ICR   | MMTV-TGF-a FM                                      | Mammary    | 3 weeks of 50% AL (AIN-93-mod)<br>3 weeks of 100% AL (AIN-93M)                         | 74              | R:22.6±0.4<br>RF:26.7±0.6   |
|                                            | CCR   | MMTV-TGF-a FM                                      | Mammary    | 75% AL (AIN-93M)                                                                       | 74              | 25.1±0.6                    |
| Lanza-Jacoby, 2013                         | ICR   | LSL-Kras <sup>G12D</sup> ;Pdx-1/Cre M              | Pancreatic | 3 weeks of 50% AL (AIN-93-mod)<br>3 weeks of 100% AL (AIN-93M)                         | 38              | 21.7 ±0.4                   |
|                                            | CCR   | LSL-Kras <sup>G12D</sup> ;Pdx-1/Cre M              | Pancreatic | 2:1 of AIN-93M:AIN-93-mod                                                              | 38              | 21.0 ±0.5                   |
| Mizuno, 2013                               | ICR   | MMTV-Her2/neu M                                    | Mammary    | 3 weeks of 50% AL (AIN-93M)<br>3 weeks of 100% AL (AIN-93M)                            | 52              | NA                          |
|                                            | CCR   | MMTV-Her2/neu M                                    | Mammary    | 75% AL (AIN-93M)                                                                       | 52              | NA                          |
| Rogozina, 2013                             | ICR   | MMTV-TGF-α FM                                      | Mammary    | 3 weeks of 50% AL (19% fat by calories )<br>3 weeks of 100% AL (33.6% fat by calories) | 74              | R:23.3±0.7*<br>RF:29.3±0.7* |
|                                            | CCR   | MMTV-TGF-α FM                                      | Mammary    | 75% AL (29.6% fat by calories)                                                         | 74              | 28.9±0.71*                  |
| Grossmann, unpublished                     | ICR   | TGF-a/Lep+ Lepab FM                                | Mammary    | 3 weeks of 50% AL (AIN-93-mod)<br>3 weeks of 100% AL (AIN-93M)                         | 72              | NA                          |
|                                            | CCR   | TGF-a/Lep+ Lepab FM                                | Mammary    | 2:1 of AIN-93M:AIN-93-mod                                                              | 72              | NA                          |
| <b>Chemically induced rat models</b>       |       |                                                    |            |                                                                                        |                 |                             |

|                      |     |                   |          |                           |    |           |
|----------------------|-----|-------------------|----------|---------------------------|----|-----------|
| Kritchevsky,<br>1989 | ICR | Sprague-Dawley FM | Mammary  | 1.75 months of 25% AL     | 16 | 325.8     |
|                      | CCR | Sprague-Dawley FM | Mammary  | 2.25 months of 100% AL    | 16 | 276       |
| Mehta, 1993          | ICR | Sprague-Dawley FM | Mammary  | 75% AL                    | 10 | 275±4.4   |
|                      | CCR | Sprague-Dawley FM | Mammary  | 2 days of 60% AL          | 10 | 234±2.8   |
| Harris, 1995         | ICR | Sprague-Dawley FM | Mammary  | 2days of 100% AL (AIN-76) | 10 | 274.85*   |
|                      | CCR | Sprague-Dawley FM | Mammary  | 60% AL (AIN-76)           | 10 | 233.92*   |
| Tagliaferro,<br>1996 | ICR | Sprague-Dawley FM | Mammary  | 2days of 60% AL           | 18 | 293.1±2.2 |
|                      | CCR | Sprague-Dawley FM | Mammary  | 2 days of 100%AL (AIN-76) | 18 | 299.7±3.9 |
| Zhu, 2005            | ICR | Sprague-Dawley FM | Multiple | 1 week of 67% AL          | 7  | 160±2.0   |
|                      | CCR | Sprague-Dawley FM | Multiple | 3 weeks of 100% AL        | 7  | 139±1.0   |
|                      |     |                   |          | 60% AL                    |    |           |

\*Data were extracted from the original figures using GetData Graph Digitizer.  
Values are means ± SE.

AIN-93-mod: 2-fold increase in protein, fat, vitamins, and minerals, and fat contents and was formulated to be isocaloric with AIN-93M diet; AL: ad libitum feeding; CCR: chronic calorie restriction; FM: female mice; ICR: intermittent calorie restriction; M: mice; MMTV: mouse mammary tumour virus; NA: not available; R: results of ICR restriction periods; RF: results of ICR refeeding periods; SE: standard error; TGF: transforming growth factor; W: week.

**Supplementary Table 4. Influence of Statiticcil Model Selection on Summary Estimate: A Sensitivity Analysis.**

| Indexes                    | Animal models          | Fixed-effects model      | Random-effects model      |
|----------------------------|------------------------|--------------------------|---------------------------|
|                            |                        | RR/SMD (95% CI)          | RR/SMD (95% CI)           |
| <b>Tumor incidence</b>     | Genetically engineered | 0.69 (0.61, 0.78)        | 0.57 (0.37, 0.88)         |
|                            | Chemically induced     | 1.53 (1.25, 1.87)        | 1.53 (1.13, 2.06)         |
| <b>IGF-1</b>               | Genetically engineered | -0.72 (-0.98, -0.46)     | -0.74 (-1.17, -0.31)      |
| <b>Leptin</b>              | Genetically engineered | -0.64 (-0.98, -0.29)     | -0.64 (-0.98, -0.29)      |
| <b>Adiponectin</b>         | Genetically engineered | <b>0.65 (0.32, 0.97)</b> | <b>0.68 (-0.02, 1.38)</b> |
| <b>No. of tumors/mouse</b> | Genetically engineered | -0.51 (-1.14,0.12)       | -0.51 (-1.14, 0.12)       |
|                            | Chemically induced     | 0.30 (-0.09, 0.70)       | 0.63 (-1.31, 2.57)        |
| <b>Age at detection</b>    | Genetically engineered | 0.17 (-0.38, 0.73)       | 0.17 (-0.38, 0.73)        |
| <b>Tumor weight</b>        | Genetically engineered | 0.15 (-0.41, 0.71)       | 0.15 (-0.65, 0.94)        |

CI: confidence interval; IGF-1: insulin-like growth factor 1; SMD: standardised mean differences; RR: relative risk (for tumor incidence).

**Supplementary Table 5. Influence of Single Studies on Summary Estimate Using Random-effects Model: A Sensitivity Analysis.**

| <b>Outcome</b>         | <b>Animal models</b>                       | <b>Study omitted</b>                       | <b>RR/SMD (95% CI)</b>                     |                         |
|------------------------|--------------------------------------------|--------------------------------------------|--------------------------------------------|-------------------------|
| <b>Tumor incidence</b> | <b>Genetically engineered mouse models</b> | None                                       | <b>0.57(0.36, 0.88)</b>                    |                         |
|                        |                                            | Berrigan,2002                              | 0.48 (0.25, 0.94)                          |                         |
|                        |                                            | Cleary,2002                                | 0.63 (0.42, 0.94)                          |                         |
|                        |                                            | Pape-Ansorge,2002                          | 0.55 (0.35, 0.89)                          |                         |
|                        |                                            | Cleary,2006                                | 0.59 (0.38, 0.92)                          |                         |
|                        |                                            | Bonorden,2009                              | 0.52 (0.31, 0.85)                          |                         |
|                        |                                            | Rogozina,2009                              | 0.64 (0.43, 0.96)                          |                         |
|                        |                                            | Dogan,2010                                 | 0.57 (0.36, 0.90)                          |                         |
|                        |                                            | Lanza-Jacoby,2013                          | 0.56 (0.35, 0.89)                          |                         |
|                        |                                            | Mizuno,2013                                | 0.49 (0.29, 0.84)                          |                         |
|                        |                                            | Rogozina,2013                              | 0.67 (0.47, 0.96)                          |                         |
|                        |                                            | Grossmann, unpublished                     | 0.54(0.33, 0.88)                           |                         |
|                        |                                            | <b>Chemically induced rat models</b>       | None                                       | <b>1.53(1.13, 2.06)</b> |
|                        | Kritchevsky,1989                           |                                            | 1.46(1.09, 1.97)                           |                         |
|                        | Mehta RS,1993                              |                                            | 1.43(1.06, 1.92)                           |                         |
|                        | Harris,1995                                |                                            | 1.37(1.06, 1.76)                           |                         |
|                        | Tagliaferro,1996                           |                                            | 1.84(1.08, 3.16)                           |                         |
|                        | Zhu,2005                                   |                                            | 1.74(1.11, 2.73)                           |                         |
|                        | <b>IGF-1</b>                               |                                            | <b>Genetically engineered mouse models</b> | None                    |
|                        |                                            | Cleary,2006                                |                                            | -0.87(-1.31, -0.04)     |
| Bonorden,2009          |                                            | -0.66(-1.19, -0.14)                        |                                            |                         |
| Rogozina,2009          |                                            | -0.73(-1.31, -0.16)                        |                                            |                         |
| Dogan,2010             |                                            | -0.61(-1.00, -0.23)                        |                                            |                         |
| Rogozina,2013          |                                            | -0.85(-1.35, -0.35)                        |                                            |                         |
| <b>Leptin</b>          |                                            | <b>Genetically engineered mouse models</b> |                                            | None                    |
|                        | Bonorden,2009                              |                                            | -0.53(-1.15, 0.09)                         |                         |
|                        | Dogan,2010                                 |                                            | -0.60(-0.97, -0.23)                        |                         |
|                        | Rogozina,2013                              |                                            | -0.71(-1.08, -0.34)                        |                         |
| <b>Adiponectin</b>     | <b>Genetically engineered mouse models</b> | None                                       | <b>0.68(-0.02, 1.38)</b>                   |                         |
|                        |                                            | Bonorden,2009                              | 0.68(-0.74, 2.11)                          |                         |
|                        |                                            | Dogan,2010                                 | 0.44(-0.33, 1.21)                          |                         |
|                        |                                            | Rogozina,2013                              | 0.96(0.39, 1.53)                           |                         |

CI: confidence interval; IGF-1: insulin-like growth factor 1; SMD: standardised mean differences; RR: relative risk (for tumor incidence).
